# Supplementary material for: The lncRNAs/miR-30e/CHI3L1 Axis Is Dysregulated in Systemic Sclerosis
Source: MDPI journal article supplement (doi:10.3390/biomedicines10020496), 2022-02-19
Supplement: s1 [file s1]

**Table S1.** Demographic and clinical characteristics of patients and controls.

| Variables                                           | Group            |               | <i>p</i> | Patients group |                |          |
|-----------------------------------------------------|------------------|---------------|----------|----------------|----------------|----------|
|                                                     | Healthy subjects | SSc patients  |          | dcSSc patients | lcSSc patients | <i>p</i> |
| N                                                   | 14               | 40            |          | 23             | 17             |          |
| Age (Mean±SD)                                       | 48.3±7.8         | 48.9±14.5     | 0.769    | 52.1±12.0      | 46±16.1        | 0.099    |
| ESR mm/h                                            |                  | 16.5          |          | 20.5           | 14             |          |
| Median (min-max)                                    | <12.0            | (4-36)        | NA       | (7-36)         | (4-21)         | 0.002**  |
| CRP, mg/L                                           |                  | 4.55          |          | 8.2            | 4.1            |          |
| Median (min-max)                                    | <6.0             | (1.1-14.8)    | NA       | (1.1-14.8)     | (2.1-13.2)     | 0.245    |
| mRSS median (min-max)                               | NA               | 16.9          | NA       | 19.4           | 12.0           | 0.008*   |
|                                                     |                  | (8-37)        |          | (8-37)         | (9-24)         |          |
| Disease duration - >3 years from first non-RP n (%) | NA               | 32 (80)       | NA       | 17 (74)        | 0              | NA       |
| Capillaroscopy                                      |                  |               |          |                |                |          |
| Active n (%)                                        |                  | 24 (60)       |          | 10 (43.6)      | 14 (82)        | NA       |
| Early n (%)                                         | NA               | 5 (12.5)      |          | 5 (21.7)       | 0              | NA       |
| Late n (%)                                          | NA               | 8 (20)        |          | 5 (21.7)       | 3 (18)         | NA       |
| Early/Active n (%)                                  |                  | 3 (7.5)       |          | 3 (13)         | 0              | NA       |
| ANA positivity n (%)                                | NA               | 34 (85)       | NA       | 23 (100)       | 11 (64)        | NA       |
| ATA n (%)                                           | NA               | 7 (20.6)      | NA       | 7 (30.4)       | 0              | NA       |
| ATA/ARA n (%)                                       | NA               | 3 (8.8)       | NA       | 0              | 3 (17)         | NA       |
| ACA n (%)                                           | NA               | 4 (11.8)      | NA       | 1 (4.3)        | 4 (23)         | NA       |
| ATA/ACA n (%)                                       | NA               | 3 (8.8)       | NA       | 3 (13)         | 0              | NA       |
| Organ involvement n (%)                             | NA               | 20 (50)       | NA       | 14 (60.9)      | 6 (35.4)       | NA       |
| PAH n (%)                                           | NA               | 2 (5)         | NA       | 0              | 2 (11.8)       | NA       |
| IHD n (%)                                           | NA               | 4 (10)        | NA       | 2 (8.7)        | 2 (11.8)       | NA       |
| ILD n (%)                                           | NA               | 3 (7.5)       | NA       | 3 (13)         | 0              | NA       |
| GIT n (%)                                           | NA               | 3 (7.5)       | NA       | 2 (8.7)        | 1 (5.9)        | NA       |
| Multiple systems n (%)                              | NA               | 8 (20)        | NA       | 7 (30.5)       | 1 (5.9)        | NA       |
| Lung fibrosis n (%)                                 | NA               | 4 (10)        | NA       | 4 (17.4)       | 0              | NA       |
| Treatment                                           |                  |               |          |                |                |          |
| CCB n (%)                                           | NA               | 6 (15)        | NA       | 1 (4.3)        | 5 (29.4)       | NA       |
| ASA n (%)                                           | NA               | 3 (7.5)       | NA       | 1 (4.3)        | 2 (11.8)       | NA       |
| MTX n (%)                                           | NA               | 4 (10)        | NA       | 2 (8.7)        | 2 (11.8)       | NA       |
| CS n (%)                                            | NA               | 3 (7.5)       | NA       | 3 (13)         | 0              | NA       |
| AZA n (%)                                           | NA               | 1 (2.5)       | NA       | 1 (4.3)        | 0              | NA       |
| Combined n (%)                                      | NA               | 23 (57.5)     | NA       | 15 (65.4)      | 8 (47.1)       | NA       |
| Data for experimental variables                     |                  |               |          |                |                |          |
|                                                     | Healthy subjects | SSc patients  | <i>p</i> | dcSSc patients | lcSSc patients | <i>p</i> |
| YKL-40 ng/ml (n)                                    | (14) 44.52       | (40) 76.58    | 0.004**  | (23) 87.1      | (17) 68.5      | 0.119    |
| Median (min-max)                                    | (28.15-70.81)    | (21.64-310.5) |          | (21.64-310.5)  | (24.32-264.7)  |          |
| CHI3L1                                              | (12) 0.924       | (31) 1.358    | 0.345    | (19) 1.153     | (12) 1.679     | 0.08     |
| (n) Median FC (min-                                 | (0.35-2.23)      | (0.34-5.14)   |          | (0.34-2.84)    | (0.8-5.14)     |          |

|                                        |                           |                            |         |                            |                           |       |
|----------------------------------------|---------------------------|----------------------------|---------|----------------------------|---------------------------|-------|
| max)                                   |                           |                            |         |                            |                           |       |
| MALAT1<br>(n) Median FC<br>(min-max)   | (12) 1.058<br>(0.12-2.46) | (31) 1.952<br>(0.04-6.38)  | 0.049*  | (19) 1.907<br>(0.04-4.39)  | (12) 2.956<br>(0.796.38)  | 0.08  |
| NEAT1<br>(n) Median FC<br>(min-max)    | (12) 1.072<br>(0.18-2.81) | (31) 2.328<br>(0.34-5.82)  | 0.008** | (19) 2.471<br>(0.34-4.79)  | (12) 1.993<br>(0.37-5.82) | 0.876 |
| miR-30e<br>(n) Mean FC<br>(SD)         | (12) 1.058<br>(0.338)     | (31) 0.799<br>(0.398)      | 0.03*   | (19) 0.829<br>(0.392)      | (12) 0.765<br>(0.425)     | 0.613 |
| miR-30a<br>(n) Median FC (min-<br>max) | (9) 0.972<br>(0.28-2.23)  | (30) 0.411<br>(0.005-2.95) | 0.01*   | (16) 0.413<br>(0.005-1.88) | (14) 0.397<br>(0.06-2.95) | 0.135 |

Systemic sclerosis – SSc; diffuse cutaneous systemic sclerosis – dcSSc; limited cutaneous systemic sclerosis – lcSSc, non-Rayno Phenomen – non-RP, ANA – anti-nuclear antibodies, ATA – anti-Scl-70 antibodies, ARA – anti-RNA polymerase antibodies, ACA – anti-centromere antibodies, RHF - right heart failure, GIT - gastrointestinal tract, IHD - ischemic heart disease, PAH - pulmonary arterial hypertension, ILD - interstitial lung disease, Calcium channel blockers – CCB, Acetylsalicylic acid – ASA, Methotrexate – MTX, Corticosteroids – CS, Azathioprin – AZA, \* statistical significance  $p < 0.05$ , \*\* statistical significance  $p < 0.01$ .
